# Supplementary material
Source: publisher site journal article supplement (https://www.dovepress.com/article/221733)
Supplement: Supplementary file 1 [file get_supplementary_file.php]

Supporting table 1. qRT-PCR primer sequences.

| **Target** | **Forward** | **Reverse** |
| --- | --- | --- |
| **CDH1** | TGCCCAGAAAATGAAAAAGG | GTGTATGTGGCAATGCGTTC |
| **S100A4** | GTGACGCCCTGTCTCTAAGC | ATAGCAACAGCGTGTGCAAG |
| **Tg** | AACCCCATTGTGTTCTCAGC | CATTAGCCCAGGCTTCAGAG |
| **Pax8** | AAGGTGGTGGAGAAGATTGG | GCTGCTCTGTGAGTCAATGC |
| **TSHr** | ATGGGGATGTACCTGCTCCT | AATGAGATTGGGGCCATGCA |
| **TTF1** | GCCTCAGTCAGAATCCCACC | GGTATGCACTCTCGAGGCTC |
| **CDC25a** | GGCAAGCGTGTCATTGTTGT | GGCTCACAGTAAGACTGGCA |
| **STK5** | GTGTACTTGGCTCGGGAGAA | CAGCTCTTCTGCAGCTCCTT |
| **GAPDH** | GGAAGGTGAAGGTCGGAGT | TGGGTGGAATCATATTGGAA |
